# Supplementary material for: Effect of Shading on Physiological Attributes and Proteomic Analysis of Tea during Low Temperatures
Source: MDPI journal article supplement (doi:10.3390/plants13010063), 2023-12-24
Supplement: s1 [file s1]

**Figure S1: Primers used in tis study.**

| Gene<br>sequence<br>number | Primer name    | Sequence (5'to3')      | TM |
|----------------------------|----------------|------------------------|----|
| Internal<br>reference      | 18S-F          | CAACCATAAACGATGCCGA    | 60 |
|                            | 18S-R          | AGCCTTGCGACCATACTCC    |    |
| 1                          | TEA_026230-F   | GCTCATATTGGAGAGGCTAT   | 60 |
|                            | TEA_026230-R   | CAACAGGAAACGCAATGAA    |    |
| 2                          | TEA_020688-F   | CGGTCTTGAATGTGGTCAT    | 60 |
|                            | TEA_020688-R   | GAAAGGCGACTGGTTGTA     |    |
| 3                          | TEA_023893-F   | ATCAGGCAGTTGAACCAGA    | 60 |
|                            | TEA_023893-R   | TGAGGATGAGTGTCTTCTTGT  |    |
| 4                          | NW_021026906-F | AGTGTGGAAGATGCCAAGTA   | 60 |
|                            | NW_021026906-R | TTGTCTCACCAGCACCAT     |    |
| 5                          | NW_021026072-F | AGTGTGGAGTCTCGTTCAG    | 60 |
|                            | NW_021026072-R | GCAACCAAACCCAGCATAG    |    |
| 6                          | NW_021024901-F | GTGAAACCTTTGGCTTTGTAGA | 60 |
|                            | NW_021024901-R | GGTGAGGAAGAGTCTTGGA    |    |
