# Supplementary figures and images for: Effect of Shading on Physiological Attributes and Proteomic Analysis of Tea during Low Temperatures
Source: MDPI journal article supplement (doi:10.3390/plants13010063), 2023-12-24

Figure S3

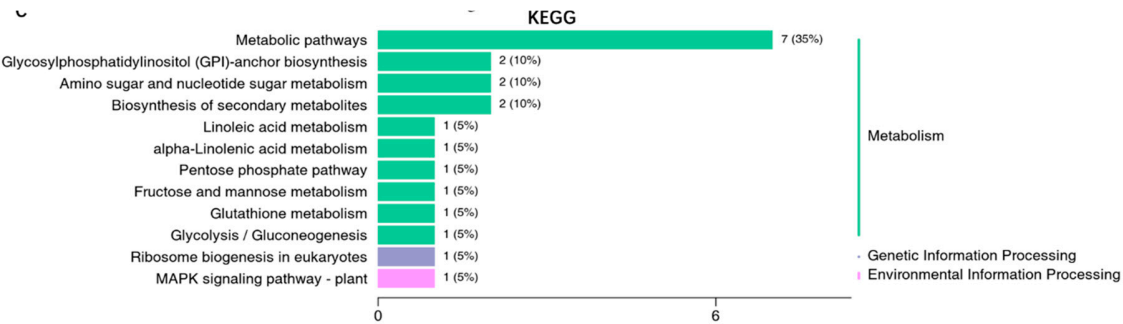

Supplement: s1 [file s1]

Figure S2

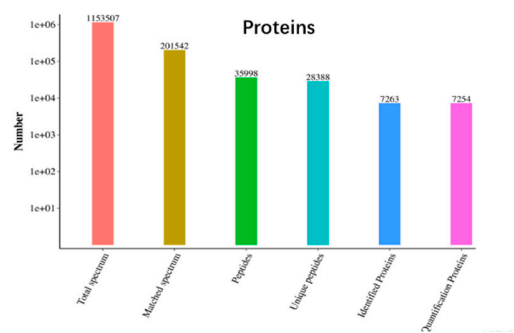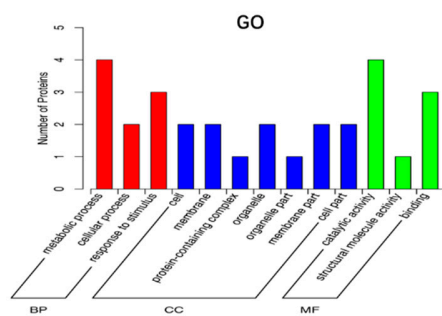

Supplement: s1 [file s1]

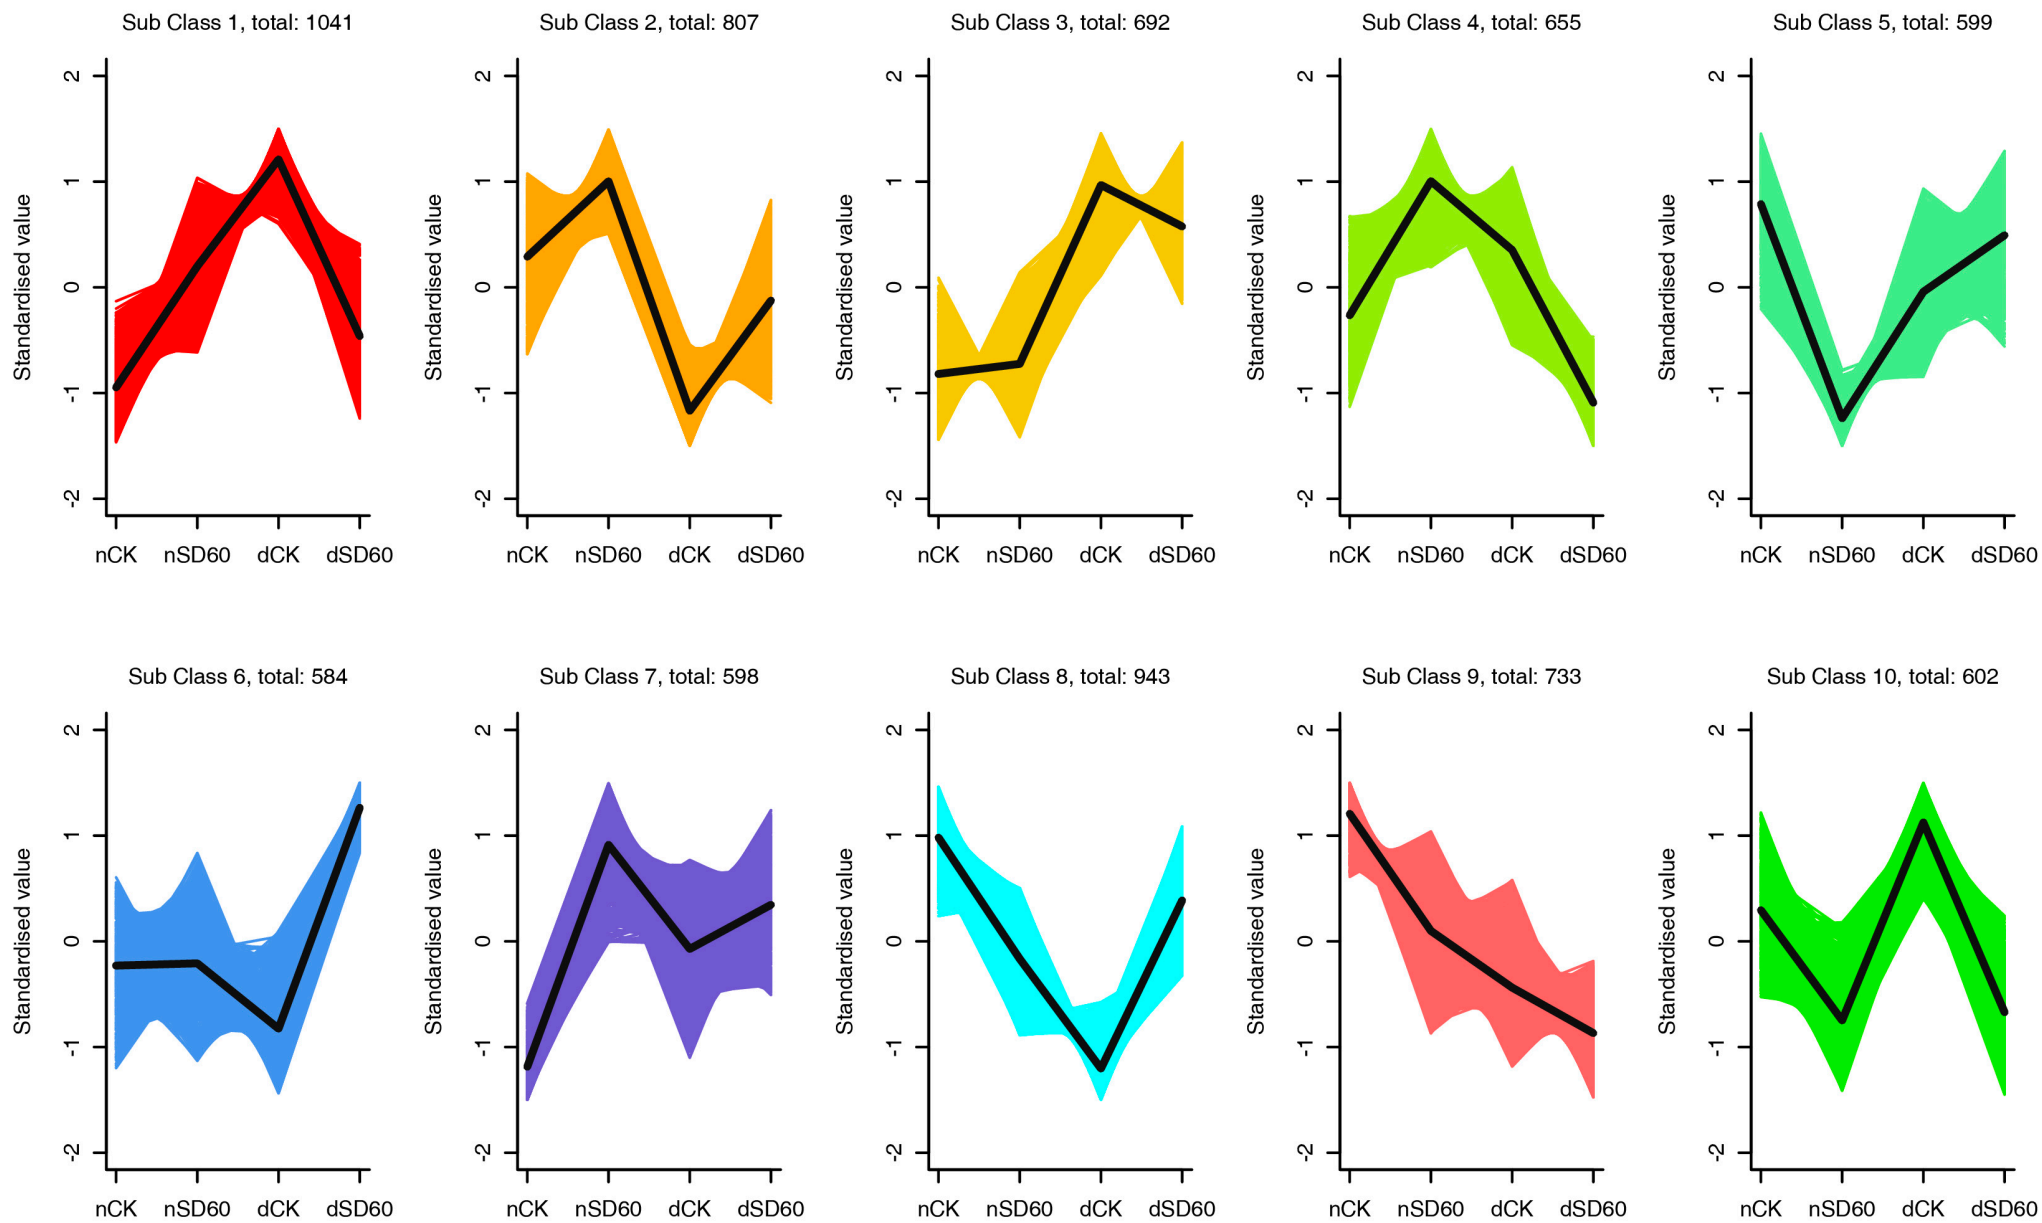

Supplement: s1 [file s1]
